# Supplementary material for: Novel columnar–calamitic phase sequences in a binary system of bent-core and rod-like mesogens
Source: Royal Society of Chemistry journal article supplement (doi:10.1039/c3tc31724b), 2013-01-01
Supplement: c3tc31724b.pdf [file c3tc31724b.pdf]

Supplementary Information

**Novel columnar-calamitic phase sequences in a binary system of bent-core and rod-like mesogens**

D.S. Shankar Rao<sup>a</sup>, M. Vijay Kumar<sup>a</sup>, S. Krishna Prasad<sup>a\*</sup>, Uma S. Hiremath<sup>a</sup>, M. Sarvamangala<sup>a,b</sup> and S. Basavaraja<sup>b</sup>

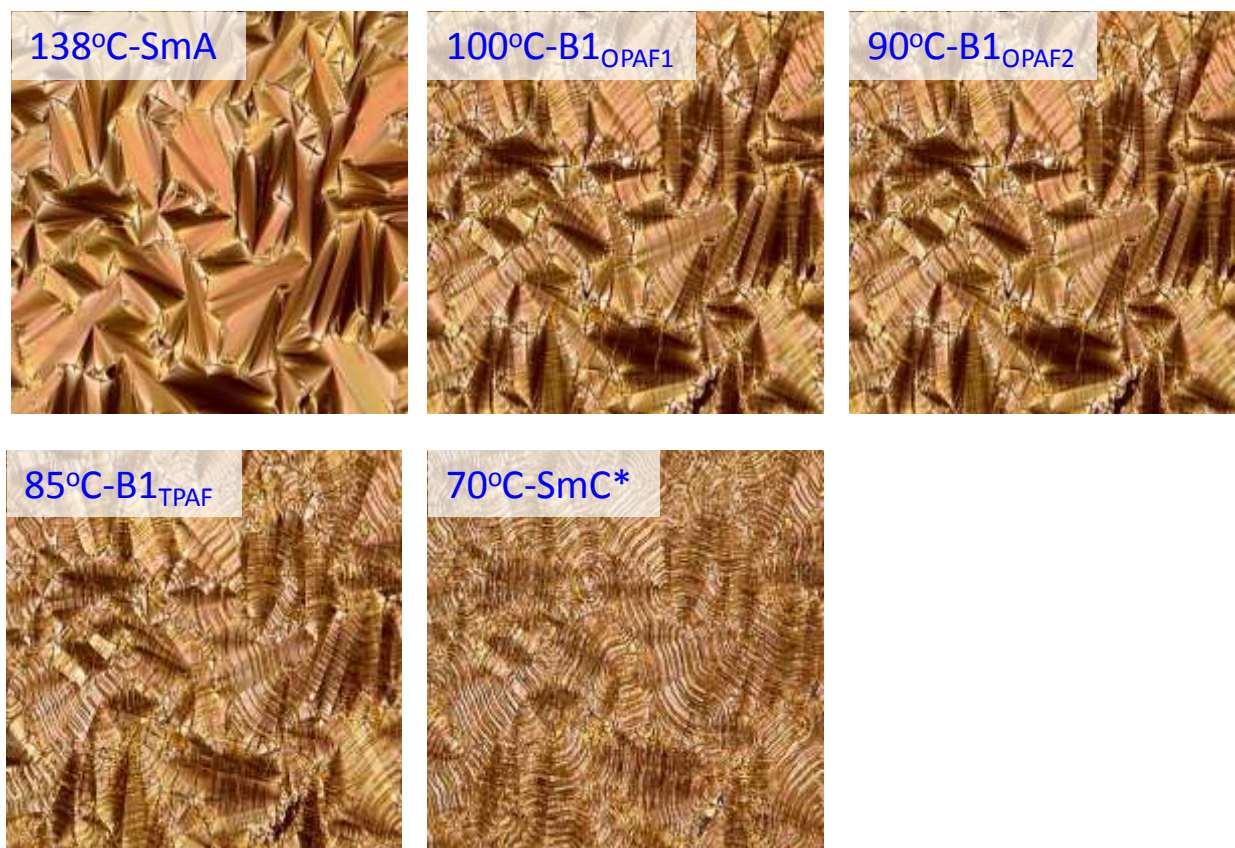

Figure S1: Polarizing microscope textures in the mesophases exhibited by the mixture.

<sup>a</sup>Centre for Soft Matter Research, Jalahalli, Bangalore 560 013, Karnataka, India, Tel: +91-80-28381119, Fax: +91-80-28382044

<sup>b</sup>Department of Physics, Gulbarga University, Gulbarga 585 106, Karnataka, India, Tel: +91-8472-263202

\*Corresponding author. Email: [skpras@gmail.com](mailto:skpras@gmail.com)

† Electronic Supplementary Information (ESI) available: [Texture photographs in the different mesophases]. See DOI: 10.1039/b000000x/
